# Supplementary material
Source: publisher site journal article supplement (https://www.dovepress.com/article/344257)
Supplement: Supplementary file 1 [file get_supplementary_file.php]

Supporting Information

| | **Highly Optimized Iron oxide embedded poly(lactic acid) nanocomposites for effective magnetic hyperthermia and biosecurity** | | --- | | Chiseon Ryu1, Hwangjae Lee1 Hohyeon Kim2, Seong Hwang1, Yaser Hadadian2,3, Ayeskanta Mohanty4, In-Kyu Park4, Beongki Cho1, Jungwon Yoon2,3,*, Jae Young Lee1,*  *1 School of Materials Science and Engineering, Gwangju Institute of Science and Technology, Gwangju 61005, Republic of Korea. 2 School of Integrated Technology, Gwangju Institute of Science and Technology, Gwangju 61005, Republic of Korea. 3 Research Center for Nanorobotics in Brain, Gwangju Institute of Science and Technology, Gwangju 61005, Republic of Korea. 4 Department of Biomedical Sciences, Chonnam National University Medical School, Hwasun-gun, Jeollanam-do, Republic of Korea* | |
| --- | --- | --- |


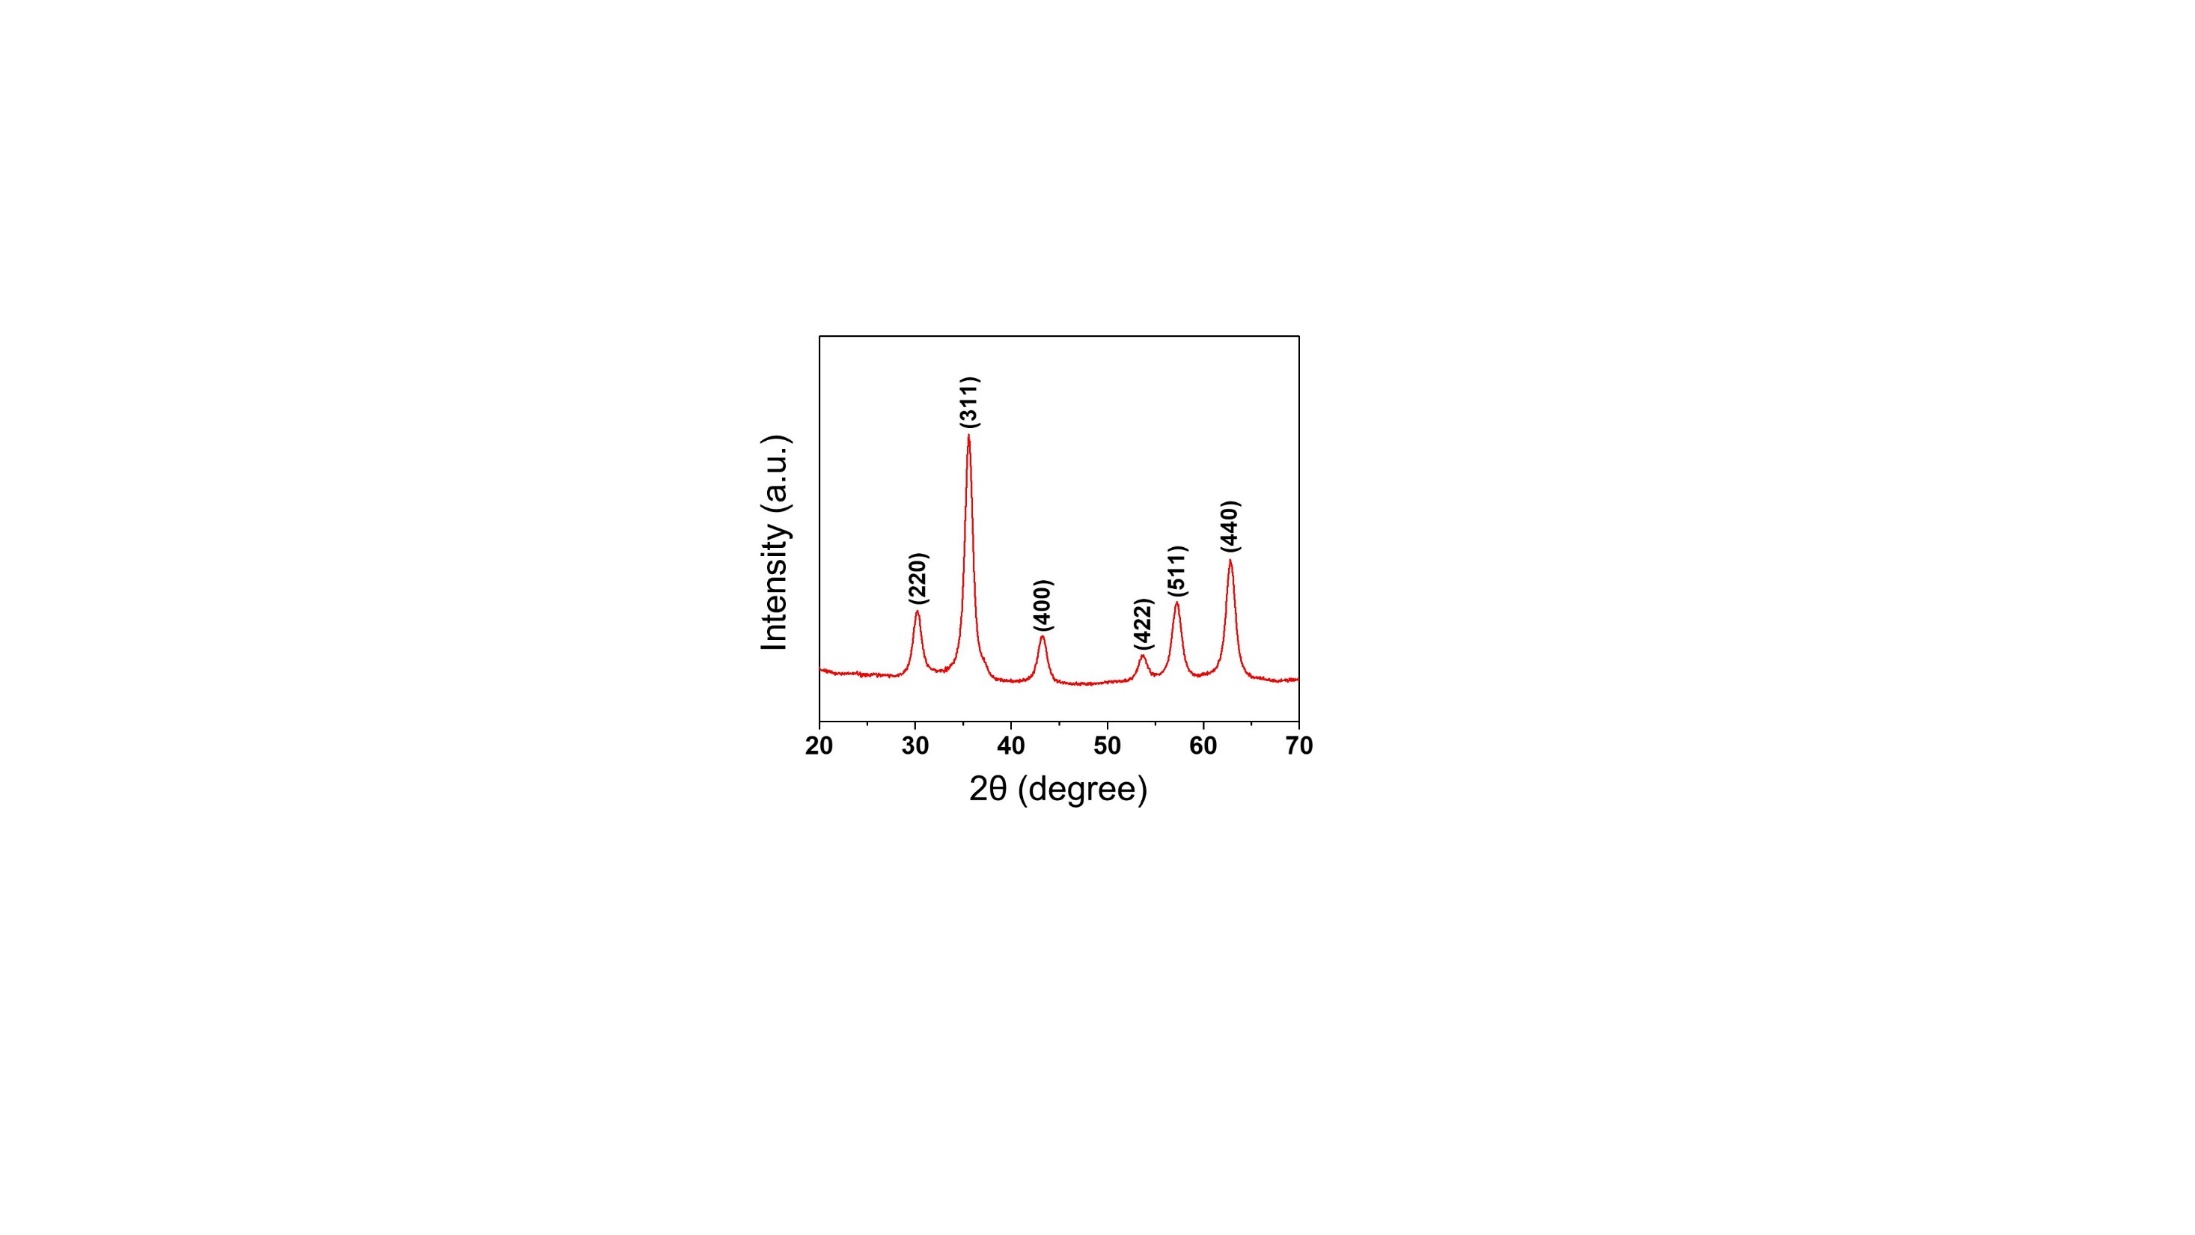


**Figure S1.** X-ray diffraction (XRD) patterns of oleic acid coated Fe3O4 nanoparticles.


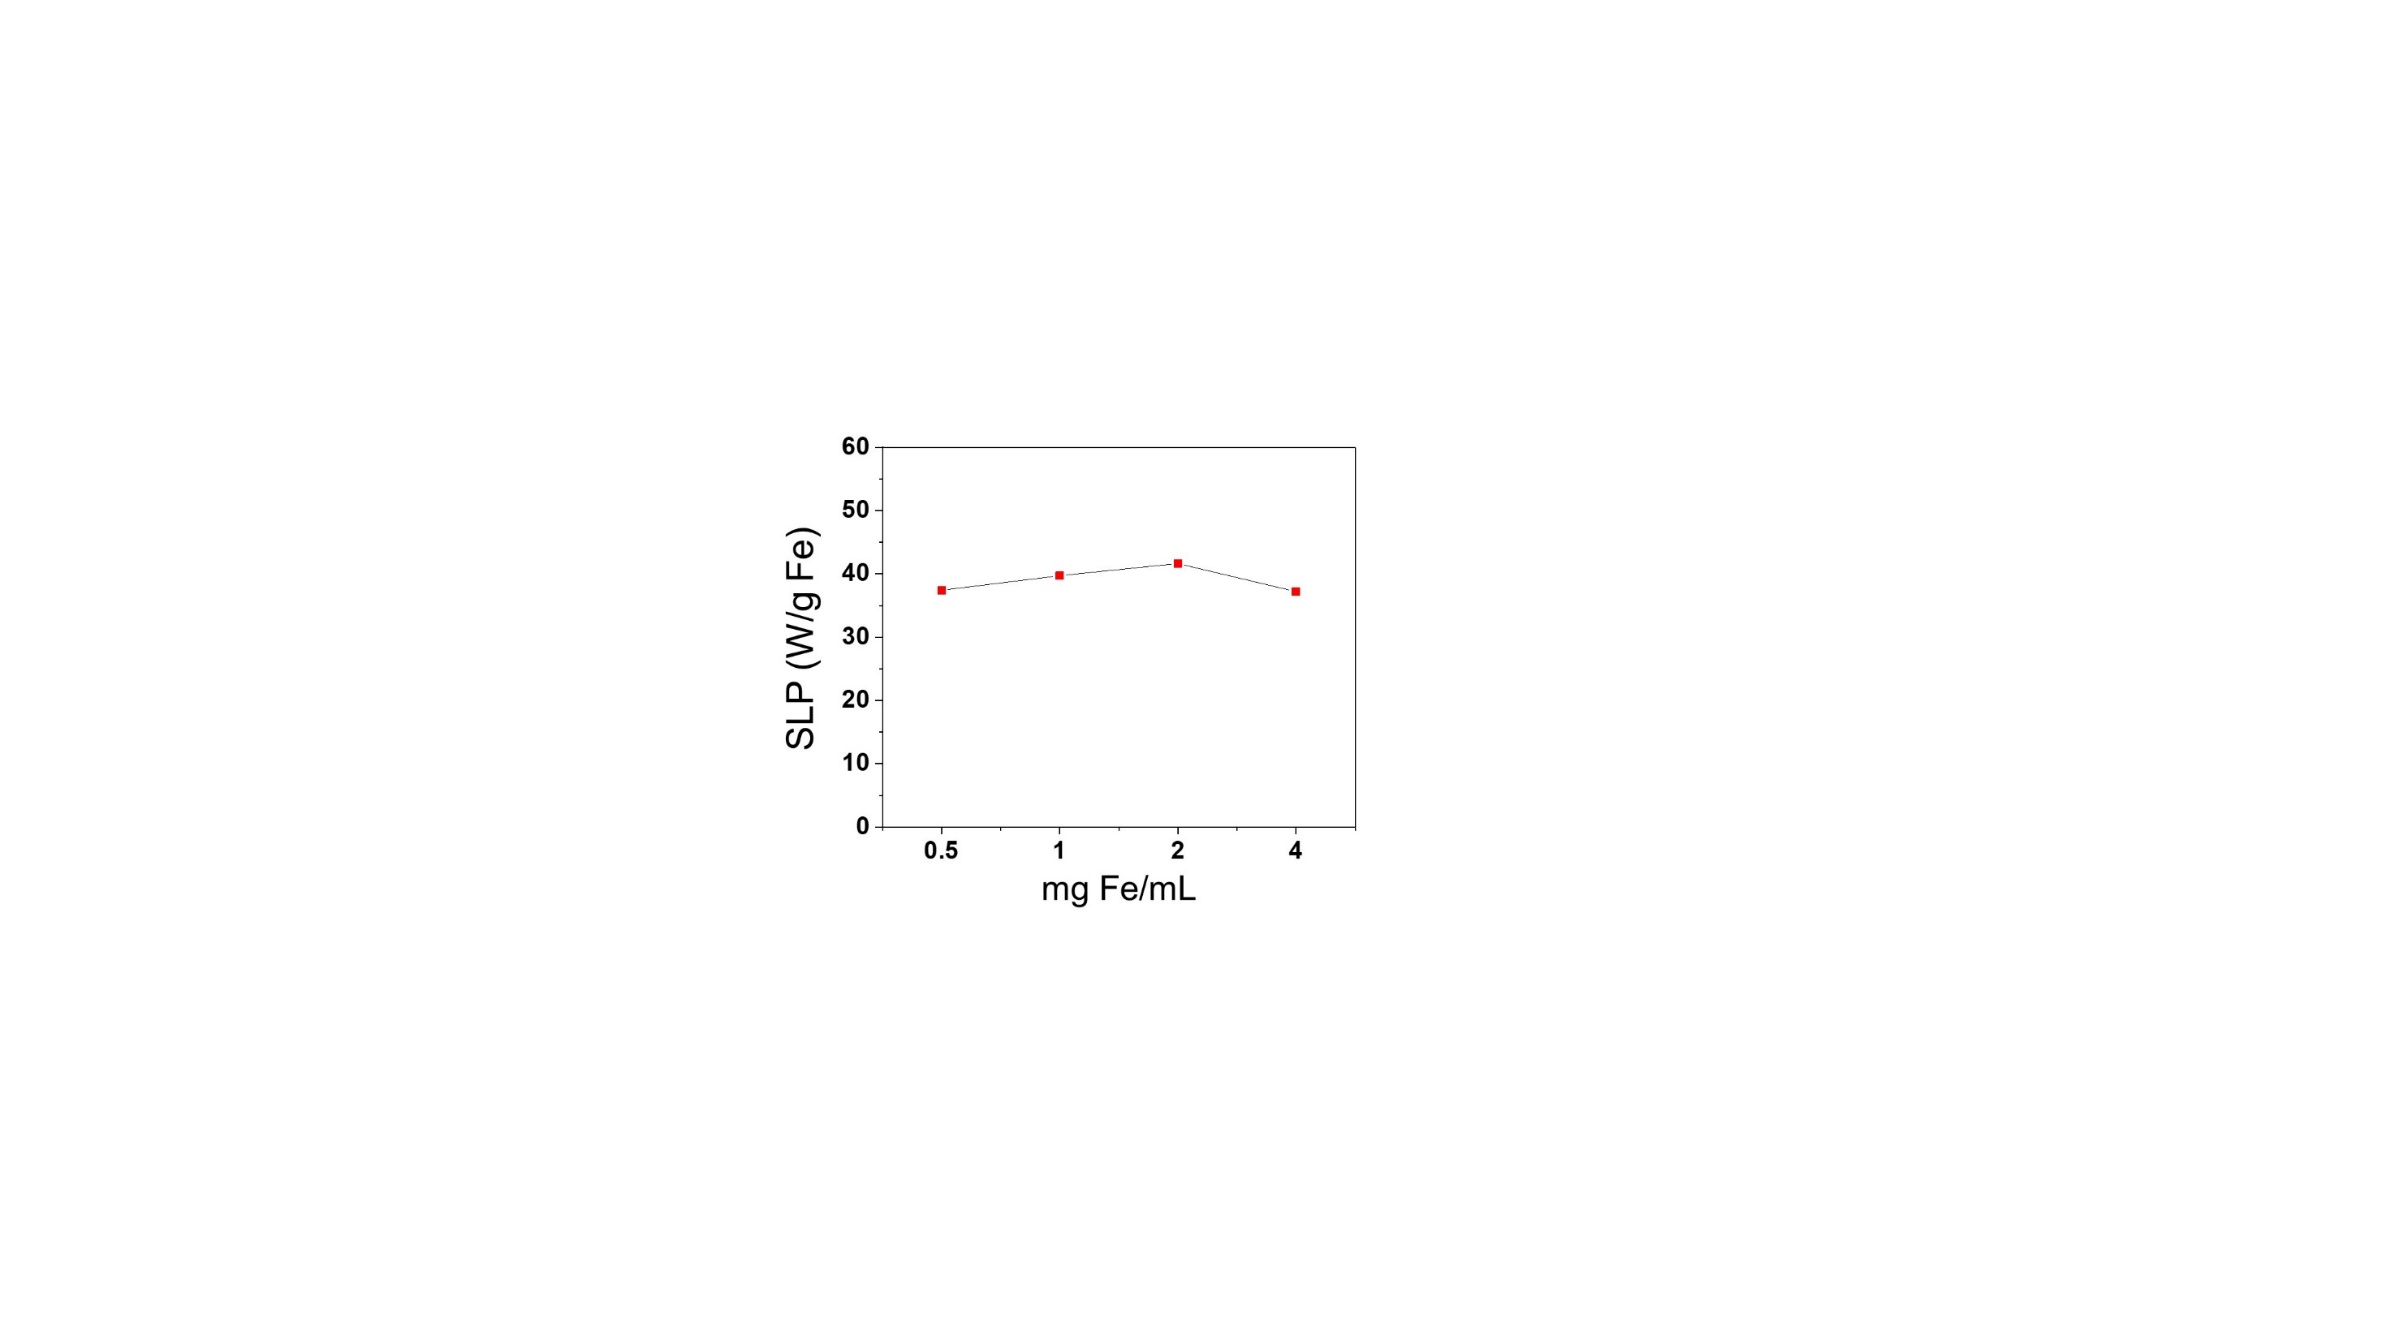


**Figure S2.** SLP value of IONPs dependent on concentration.


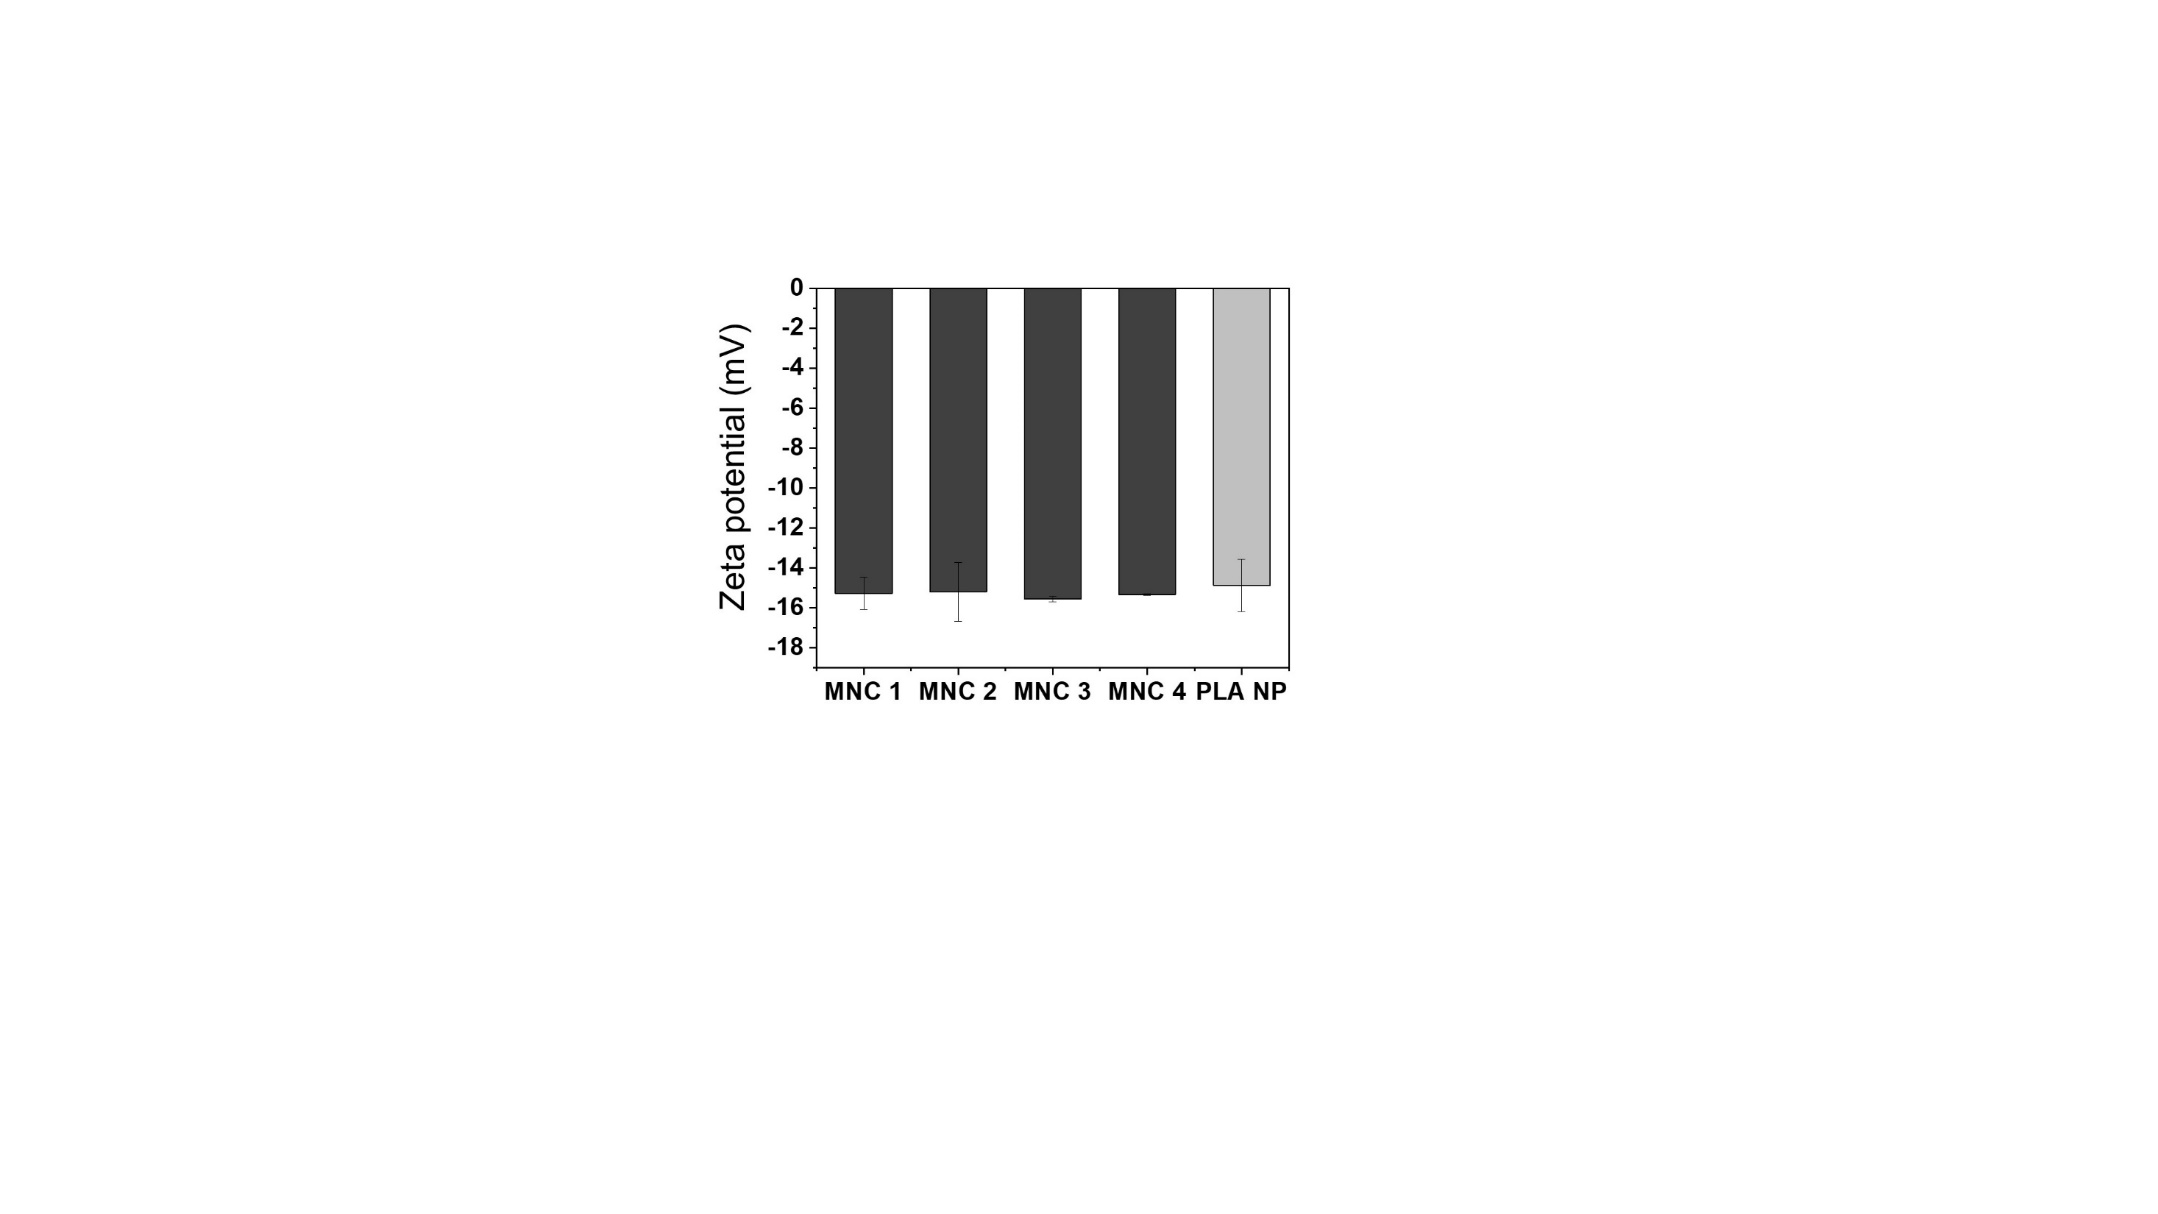


**Figure S3.** Zeta potential of MNCs and PLA NP (synthesized without IONPs).


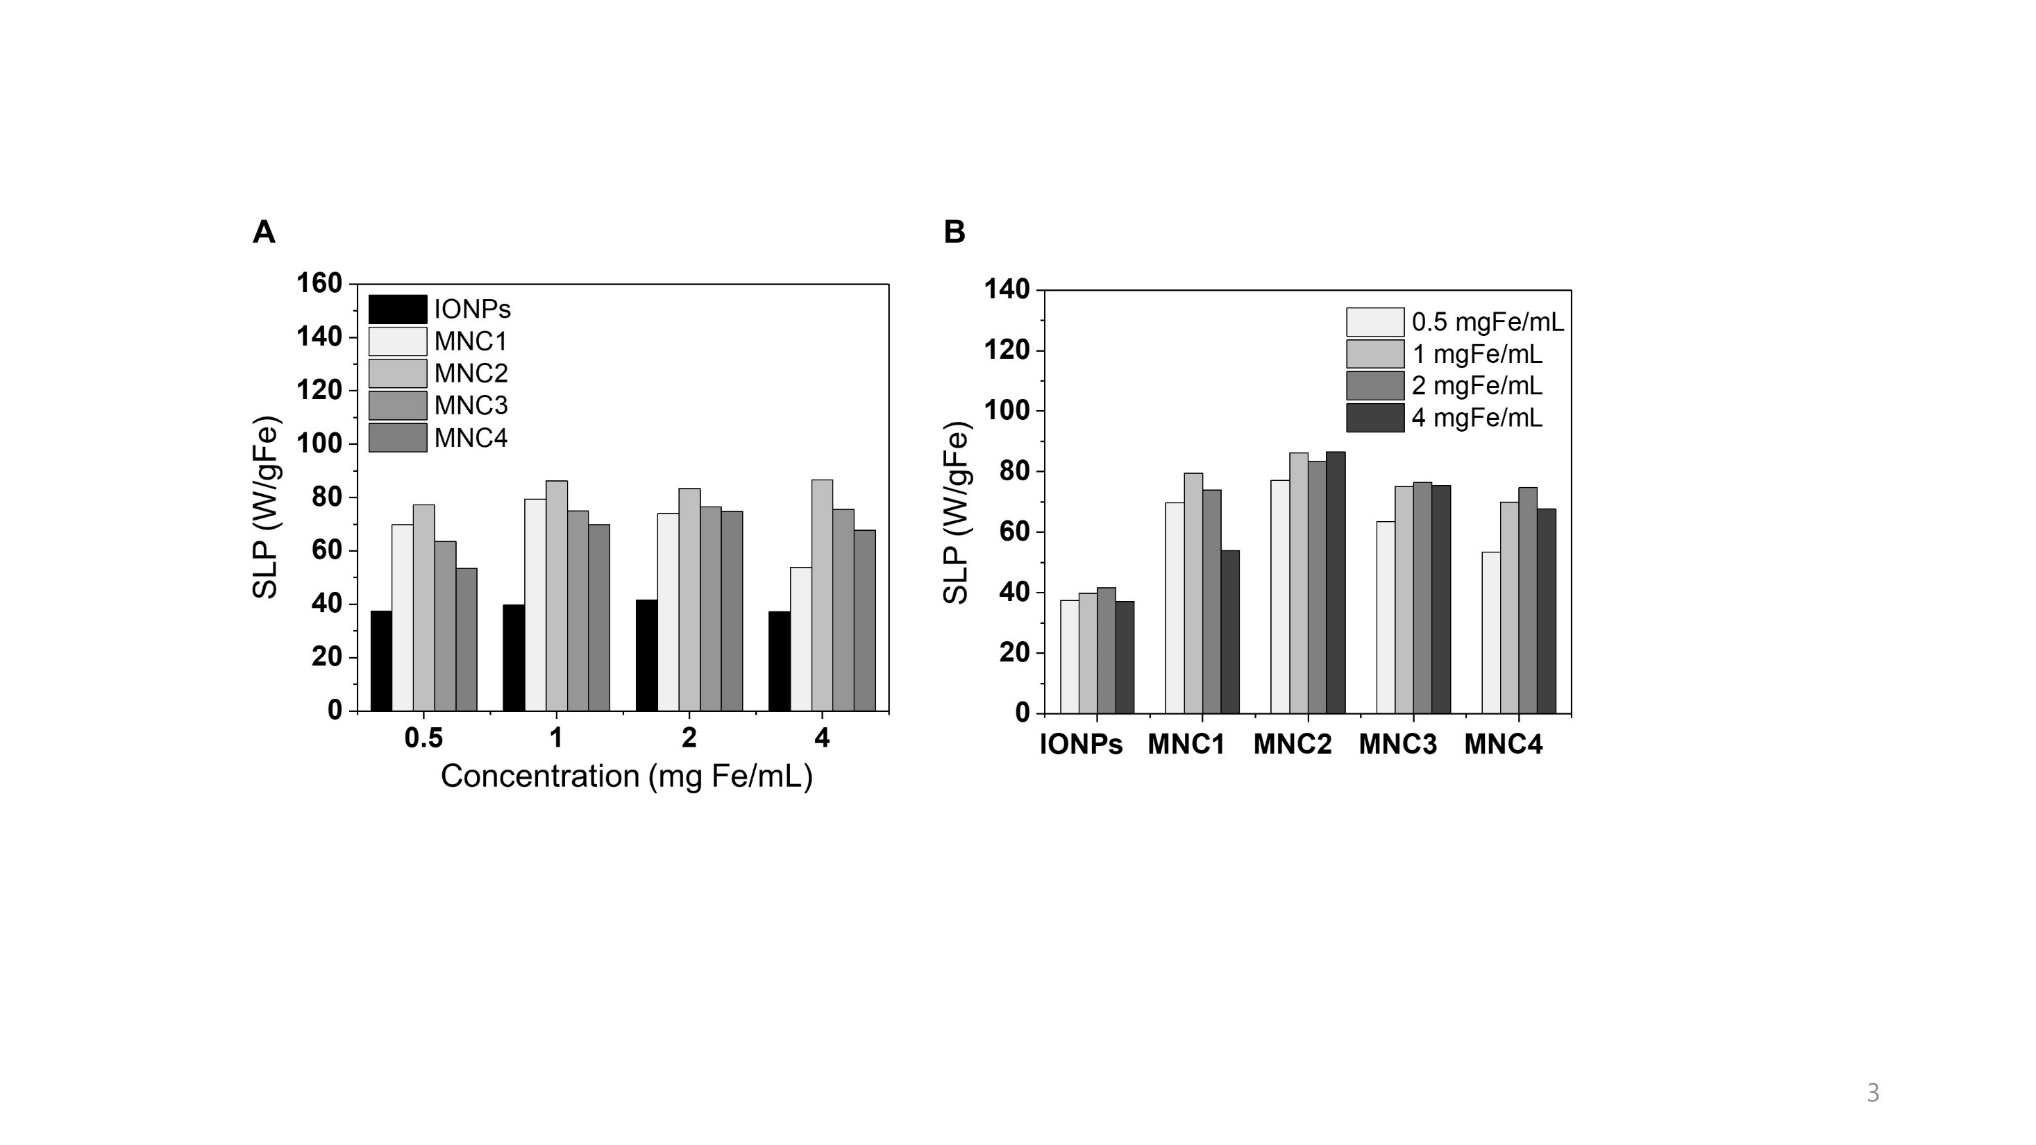


**Figure S4.** Heating efficiency of IONPs and MNCs. (A) SLP values of the IONPs and MNCs at their different concentrations in 1-octanol. (B) SLP values of various nanoparticle at different concentrations in 1-octanol.


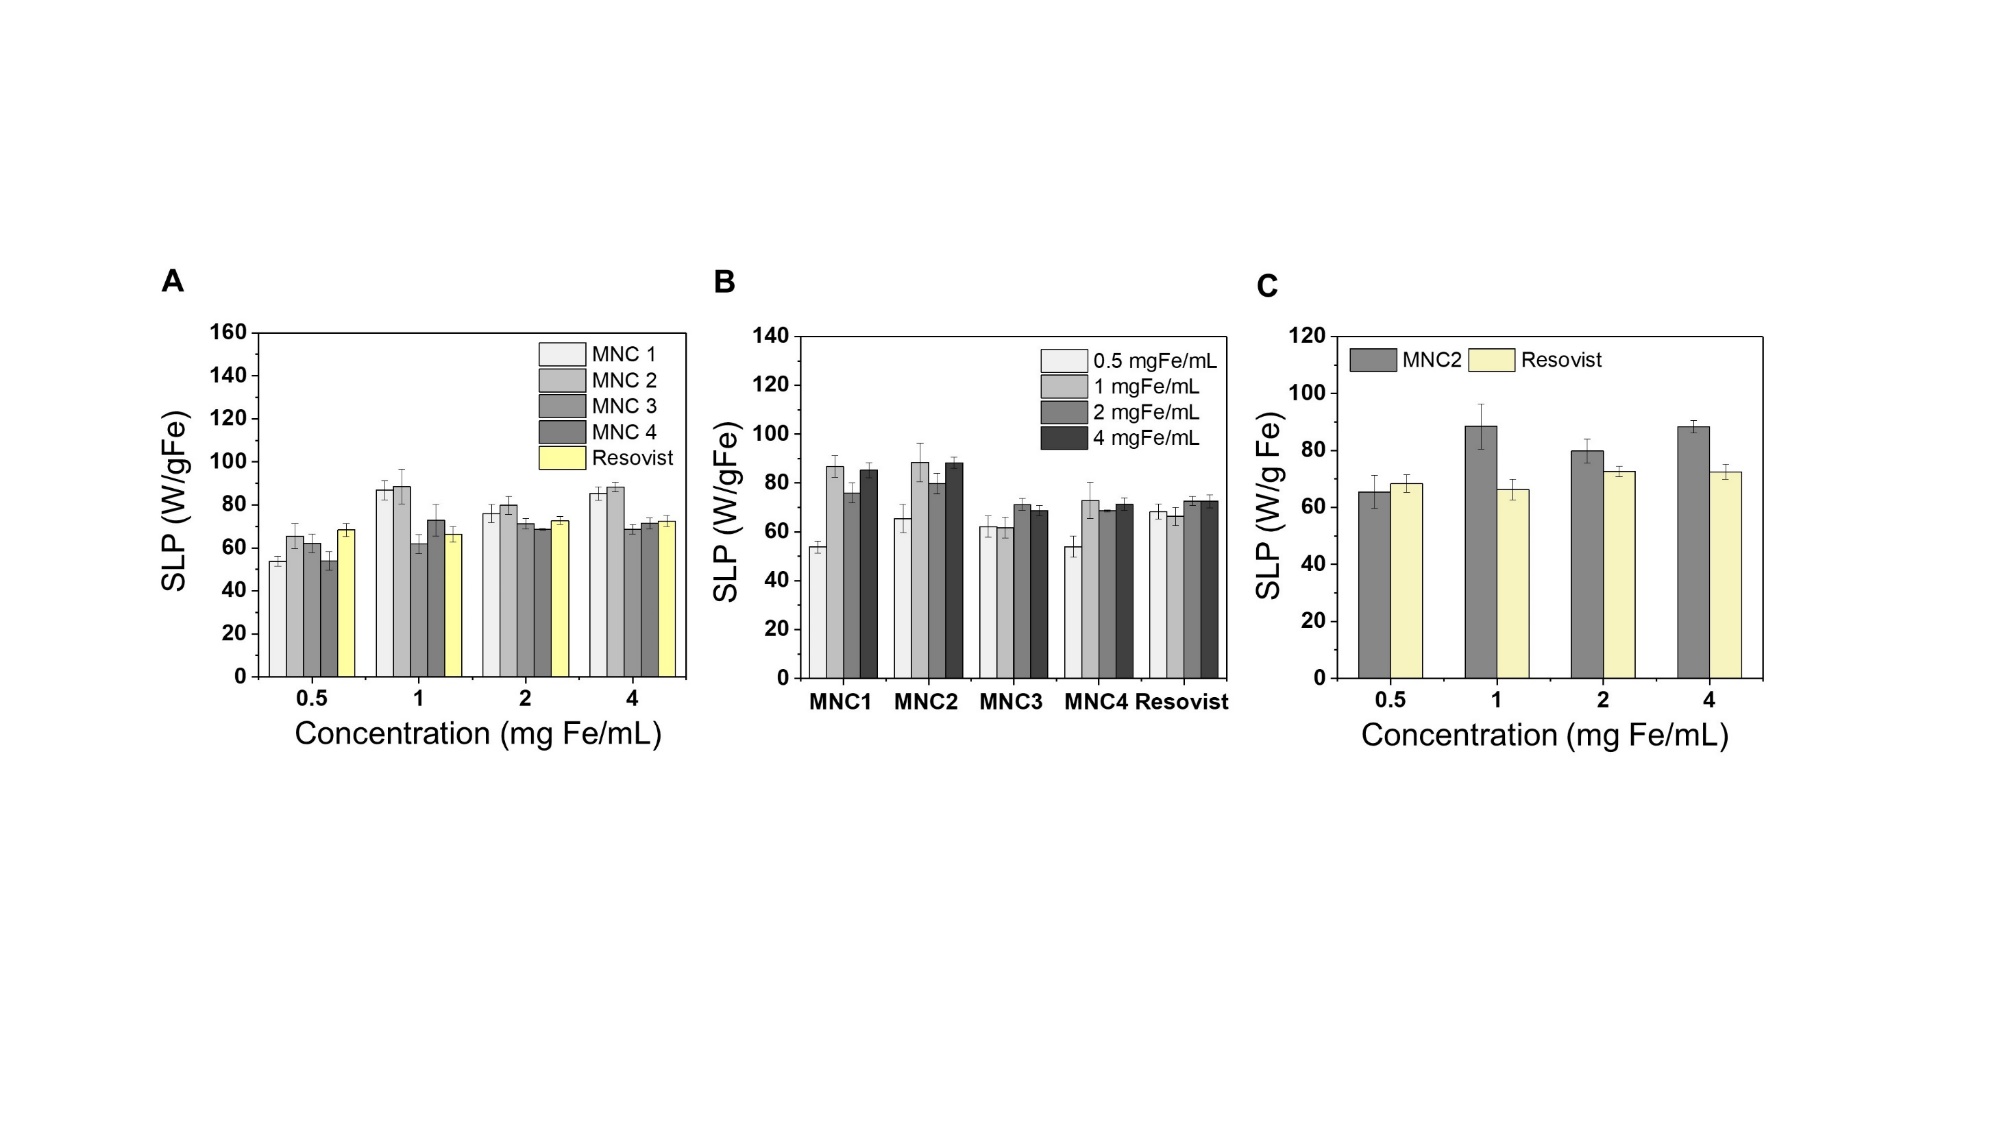


**Figure S5.** Heating efficiency of MNCs and Resovist. (A) SLP values of the MNCs and Resovist at their different concentrations in DIW. (B) SLP values of various nanoparticle at their different concentrations in DIW. (C) SLP values of MNC 2 and Resovist at different concentrations in DIW.


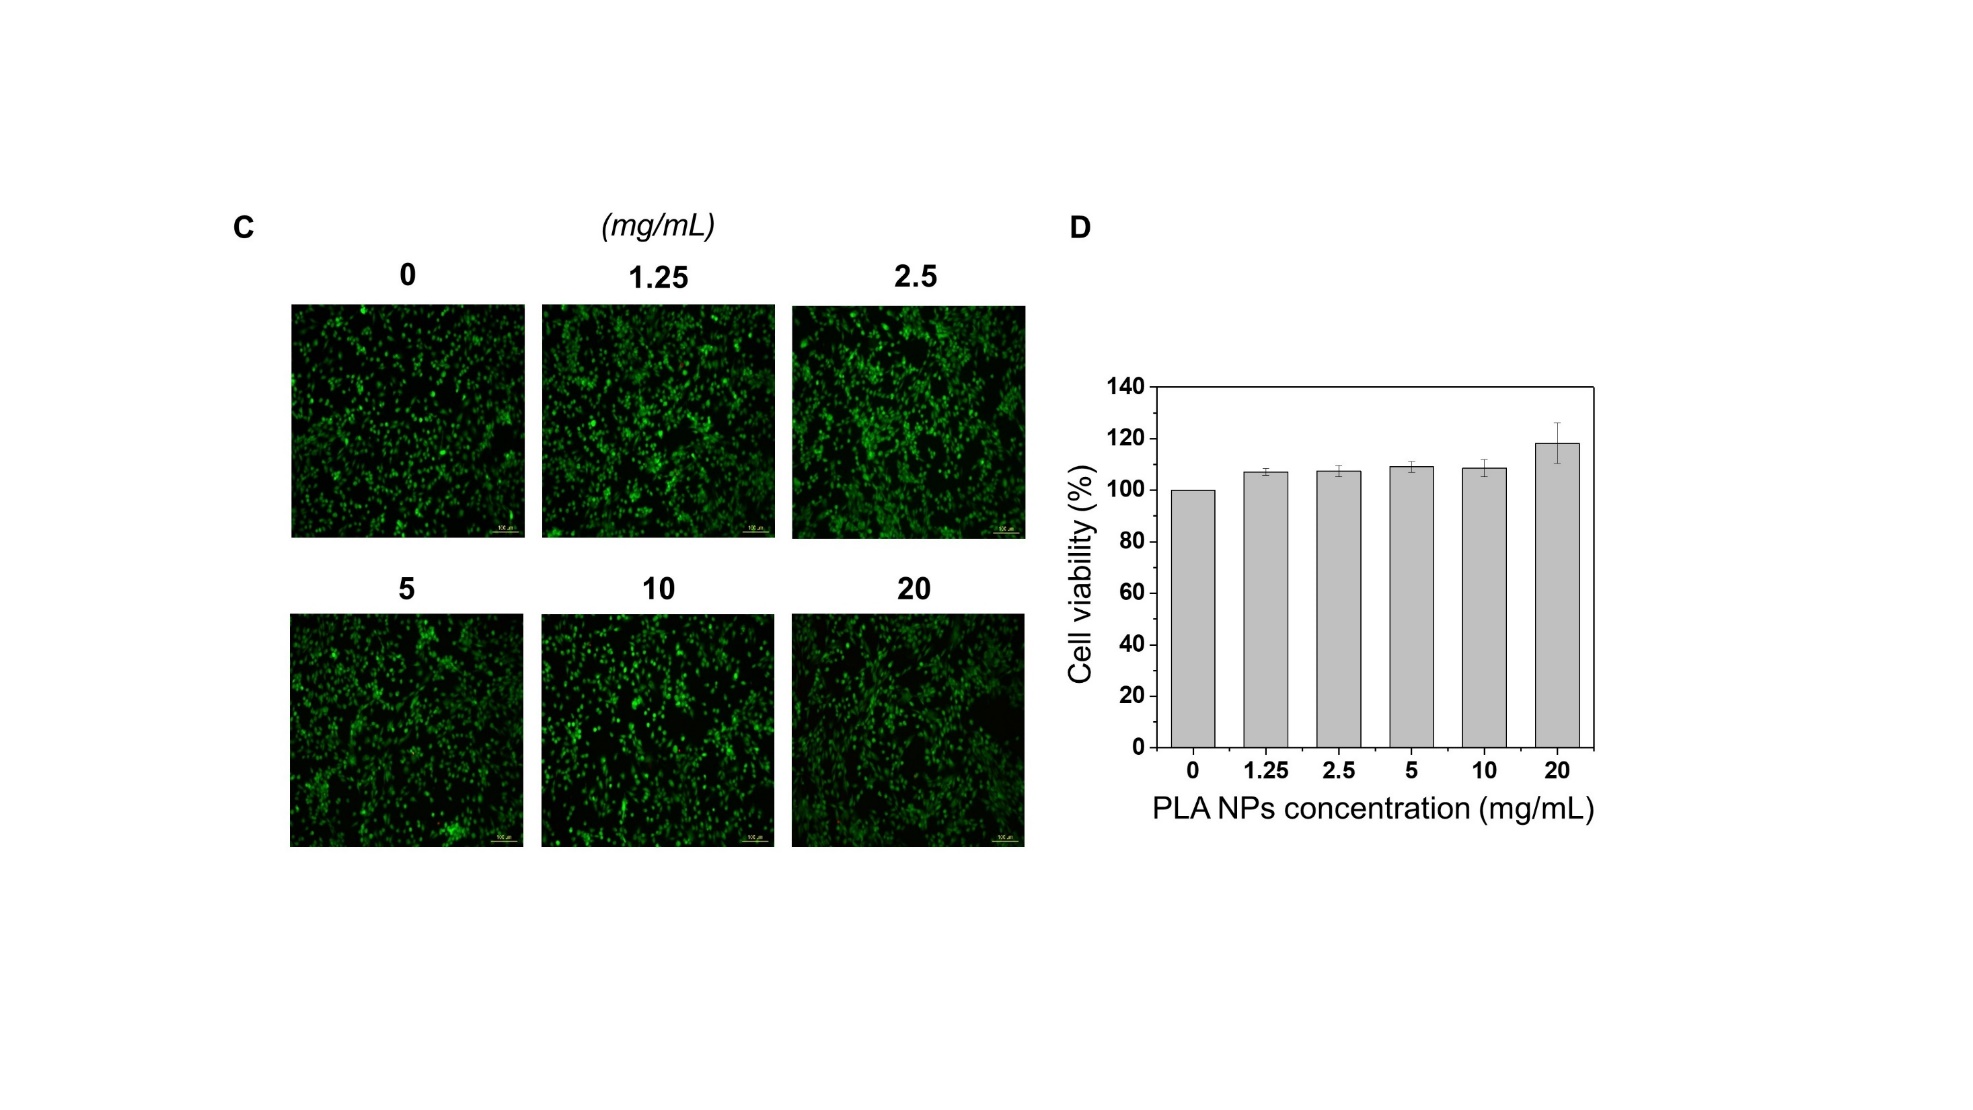

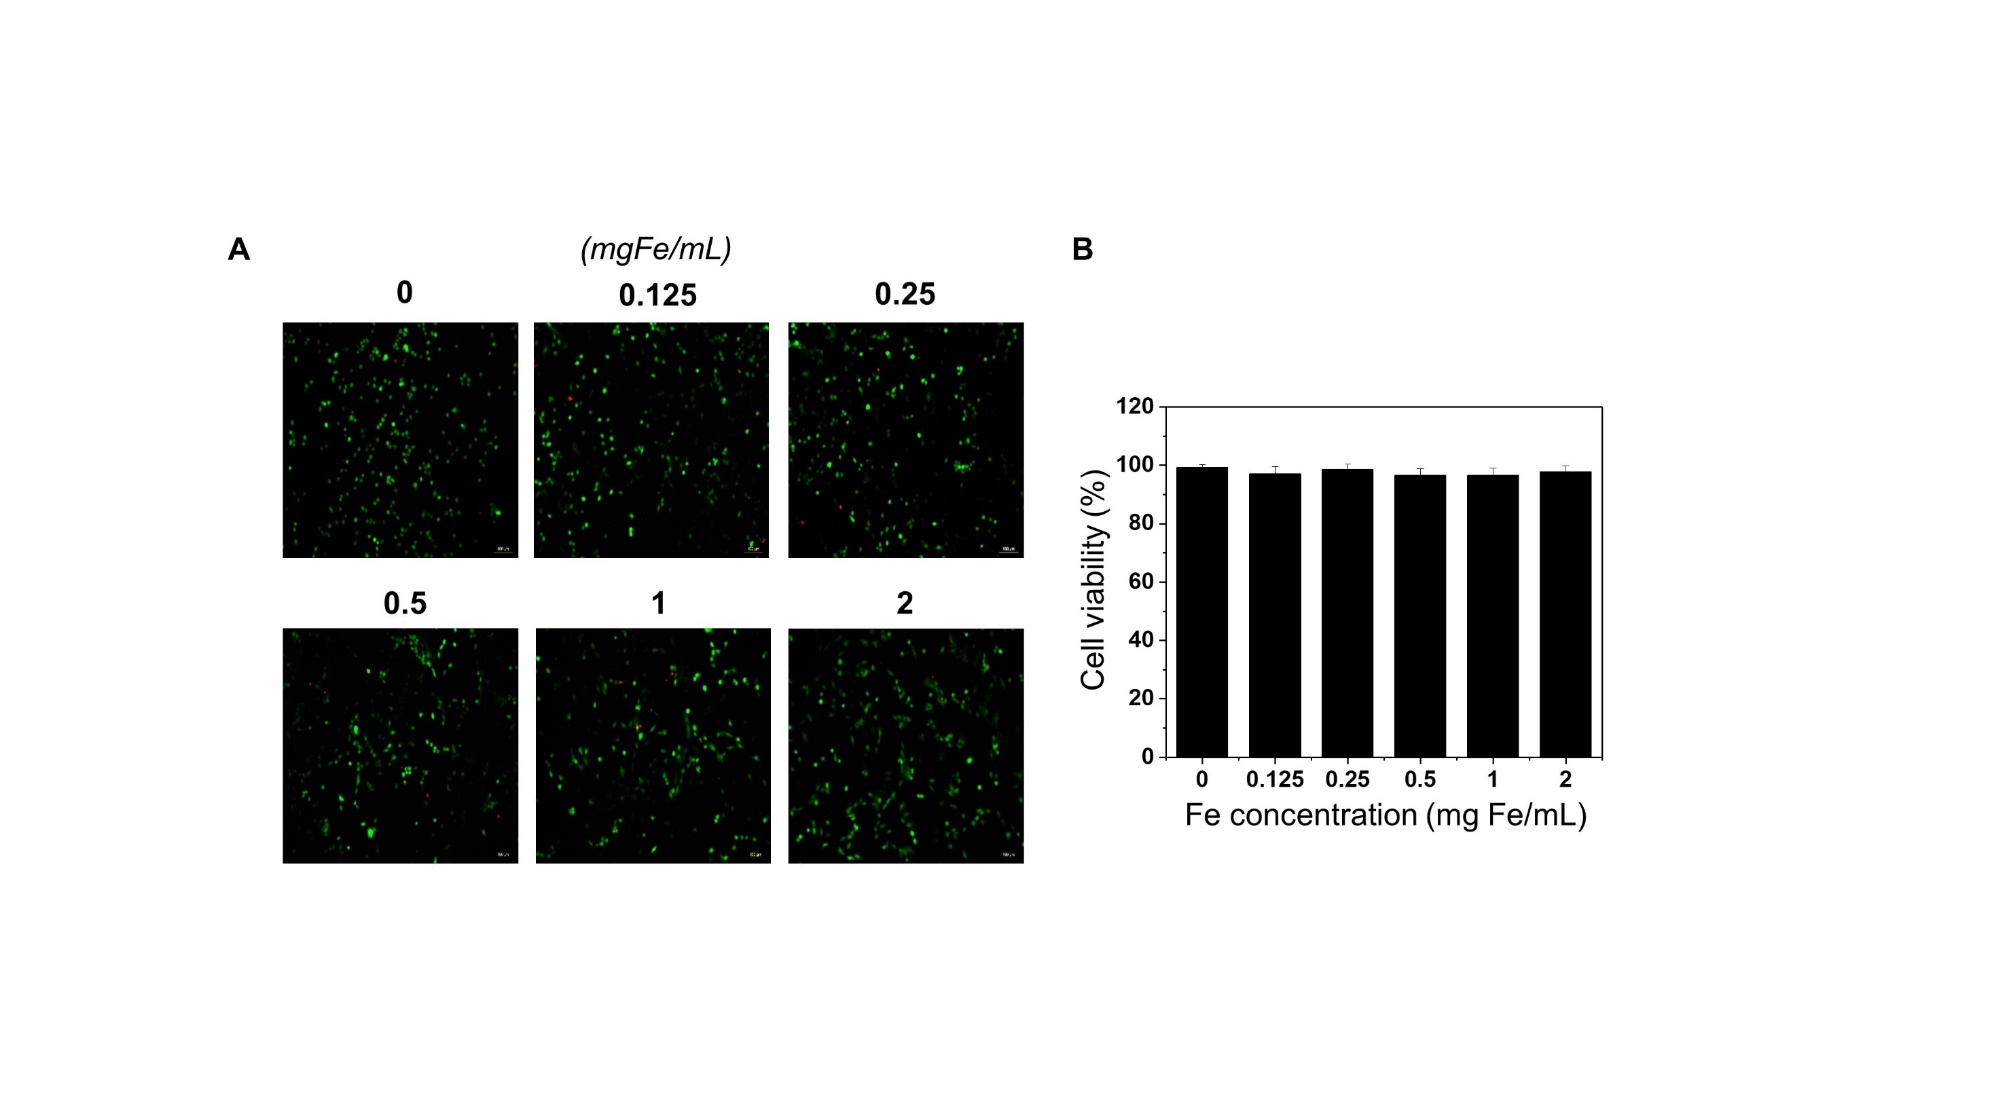


**Figure S6**. Cytocompatibility tests of the IONPs and PLA NPs with NIH-3T3 cells. (A) Fluorescence micrographs of the cells after the incubation with IONPs at different concentrations for 1 day. The green and red cells in the images indicate live and dead cells, respectively. Scale bars are 100 μm. (B) viability of the cells cultured with IONPs after incubation for 1 day. (C) Fluorescence micrographs of the cells after the incubation with PLA NPs at different concentrations for 1 day. (D) viability of the cells cultured with PLA NPs after incubation for 1 day.
